# Supplementary material
Source: PubMed Central journal article supplement (PMC7836904)
Supplement: mmc1.pdf [file mmc1.pdf]

## Supplement: Viruses such as SARS-CoV-2 can be partially shielded from UV radiation when in particles generated by sneezing or coughing: Numerical simulations

### 1. Effect of the number of virions per particle ( $N_v$ ) dried respiratory fluid on $R_i$

This section explores how the number of virions affects the results, and how the number of virions compares with other work. As noted in section 2 of the paper, the measured concentrations of SARS-CoV-2 virions in saliva and nasopharyngeal fluids varied from  $4 \times 10^4$  to  $4 \times 10^{10}$  copies/mL (Wyllie, 2020). The resulting average numbers of virions per particle ( $N_v$ ), for 9- $\mu$ m particles, range from approximately 0.001 to 3700 (see Section 2). The large majority of dried 9- $\mu$ m particles from the persons studied by Wyllie et al. (2020) would have 10 or fewer virions, and the most common number of virions per particle overall would be zero. Other researchers have indicated lower numbers of virions per 9- $\mu$ m dried particle, e.g. Vejerano and Marr (2018).

Figures 2 and 3 in the main paper illustrate that intensity of a virion within a dried droplet, relative to a naked virion on a surface ( $R_i$ ) spans several orders of magnitude. Thus large number of virions, e.g., 10,000, are used to obtain a distribution of the  $R_i$ . For the simulations in the paper a total of 12000 virions were used for 9  $\mu$ m particles. The number of virions was selected to use as many as possible while still being able to be run in a short amount of time <48 hours. We desire ensemble averages for many particles each containing randomly dispersed virions, where  $N_v$  is not so large that virions cause large variations in the  $R_i$  of other virions. Problems with attempting to calculate the  $R_i$  in a sphere containing 10,000 virions are that increasing the virions per particle increases the runtime and increases the probability of virions having a significant effects on the  $R_i$  of other virions. On the other hand, running the MSTM code for 2500 sets of four-virions each is possible but tedious to setup and run. Therefore, we investigated the effects of  $N_v$  per particle on interactions within particles and runtimes. We generated a set of 4000 virions, randomly positioned within a 9-um diameter spheres, and selected 10 of these virions for comparison. The  $R_i$  were then calculated for the sphere on a surface for  $N_v = 10, 25, 50, 100, 250, 500, 1000, 2000, 3000$  and 4000. The differences between the  $R_i$  of only these 10 virions in a dried saliva droplet and these 10 virions in a dried saliva drop  $N_v$  higher than 10 are illustrated in Fig. S1. It is clear that even when  $N_v = 4000$  virions, there is less than a 5% difference between the individual virions. When  $N_v = 100$ , this difference drops to <0.5%. Even with  $N_v = 4000$ , the virions still only comprise about 0.5% of the volume for this case, where the difference between the  $m_r$  of material of the virion and of dried particle is small. Thus, there is a relatively small effect. Similarly, for a 5  $\mu$ m particle, the  $R_i$  were calculated for the sphere on a surface for  $N_v = 5, 10, 25, 50, 100, 400, 800$  (Figure S2). When  $N_v = 25$ , the maximum difference is also about 0.5%.

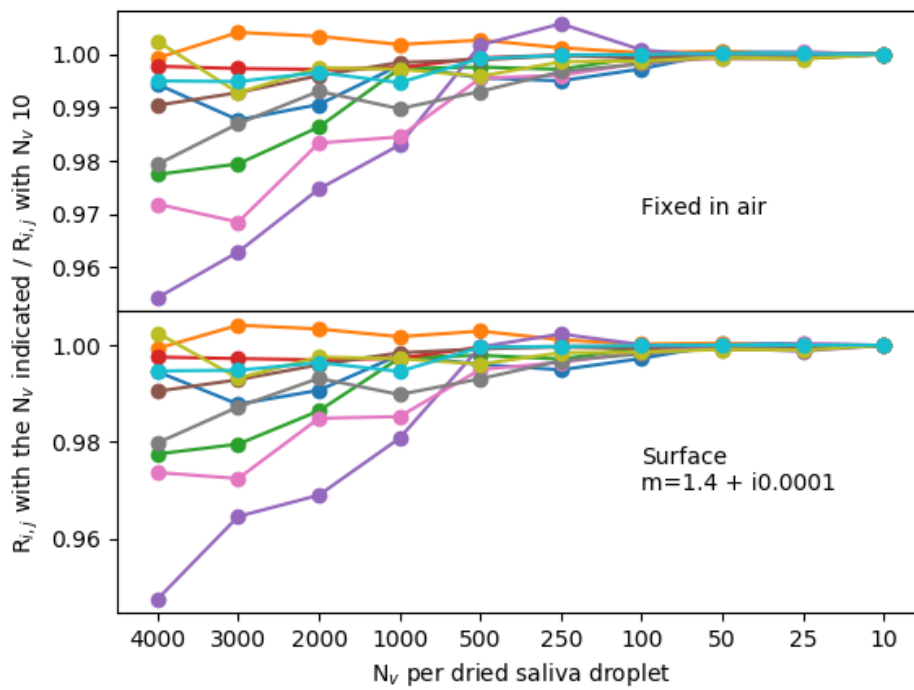

Figure S1: Ratios of  $R_{i,j}$  (with the  $N_v$  shown) to the  $R_{i,j}$  with  $N_v=10$ , for a 9-um saliva particle illuminated with 260-nm UV. The horizontal axis is of  $N_v$ . The position of each virion is the same in all runs. The first 10 virions in all cases have the same positions as the virions from the 10 virion case. Each dot shows the ratio of the  $j$ th virion in the particle with the  $N_v$  indicated, to the  $j$ th virion of the particle with  $N_v = 10$ , where a different color is used for each  $j$  (same for both line and dot). (a) Ratio of  $R_{i,j}$  with the  $N_v$  indicated to the  $R_{i,j}$  with  $N_v=10$  for particles fixed in air. (b) Ratio of  $R_{i,j}$  with the  $N_v$  indicated to the  $R_{i,j}$  with  $N_v=10$  for particles on a surface with the complex refractive index of  $1.4 + i0.0001$ . Each color is associated with a different one of the 10 virions compared.

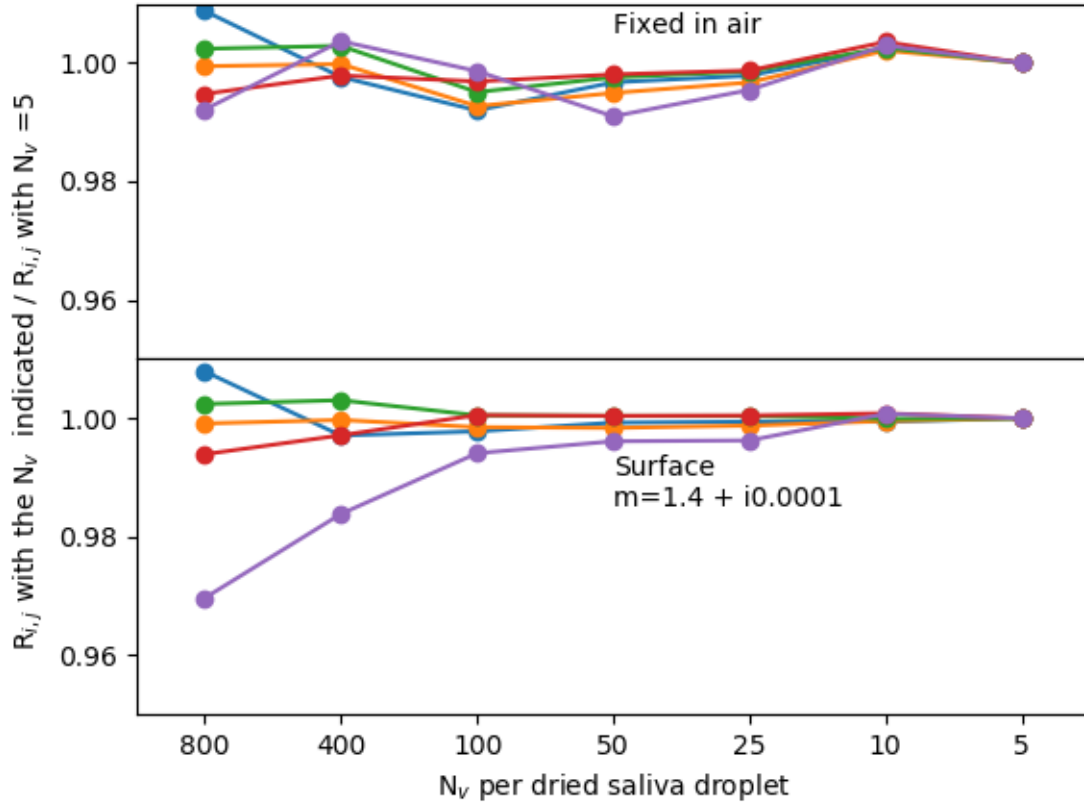

Figure S2: Ratios of  $R_{i,j}$  (with the  $N_v$  shown) to the  $R_{i,j}$  with  $N_v=5$ , for a 5- $\mu\text{m}$  saliva particle illuminated with 260-nm UV. The horizontal axis is of  $N_v$ . The position of each virion is the same in all runs. The first 5 virions in all cases have the same positions as the virions from the 5 virion case. Each dot shows the ratio of the  $j$ th virion in the particle with the  $N_v$  indicated, to the  $j$ th virion of the particle with  $N_v = 5$ , where a different color is used for each  $j$  (same for both line and dot). (a) Ratio of  $R_{i,j}$  with the  $N_v$  indicated to the  $R_{i,j}$  with  $N_v=5$  for particles fixed in air. (b) Ratio of  $R_{i,j}$  with the  $N_v$  indicated to the  $R_{i,j}$  with  $N_v=5$  for particles on a surface with the complex refractive index of  $1.4 + i0.0001$ . Each color is associated with a different one of the 5 virions compared.

## 2. Distributions with 4000 particles in the same 9 $\mu\text{m}$ particle

The previous section illustrated that the  $R_i$  values were slightly different when 4000 particles were used in a dried particle compared with a case with 100 virions, and showed that for 10 selected virions, the effect of increasing the number of virions was small, for the calculated test cases. However, the view in terms of 10 selected virions is incomplete because it only focuses on a few virions. To gain a more complete picture for 4000 virions, a histogram of the  $R_i$  values from a 4000 virion dried particle was compared to the histogram of 120x100 virions in 120 particles (Figure 3c in the main paper). These 4000 virions are located at the same locations in the particle as the first 4000 virions in the 120x100 virion cases described in the main paper.

Figure S3 illustrates, for 260 nm UV illumination, distributions the respective cases. Little difference is noted for both the particle fixed in air, and on a surface. Thus, the overall conclusions in this paper should be true regardless of the actual numbers of virions in a dried respiratory particle. A longer discussion of uncertainties is present in the main paper (section 4.2).

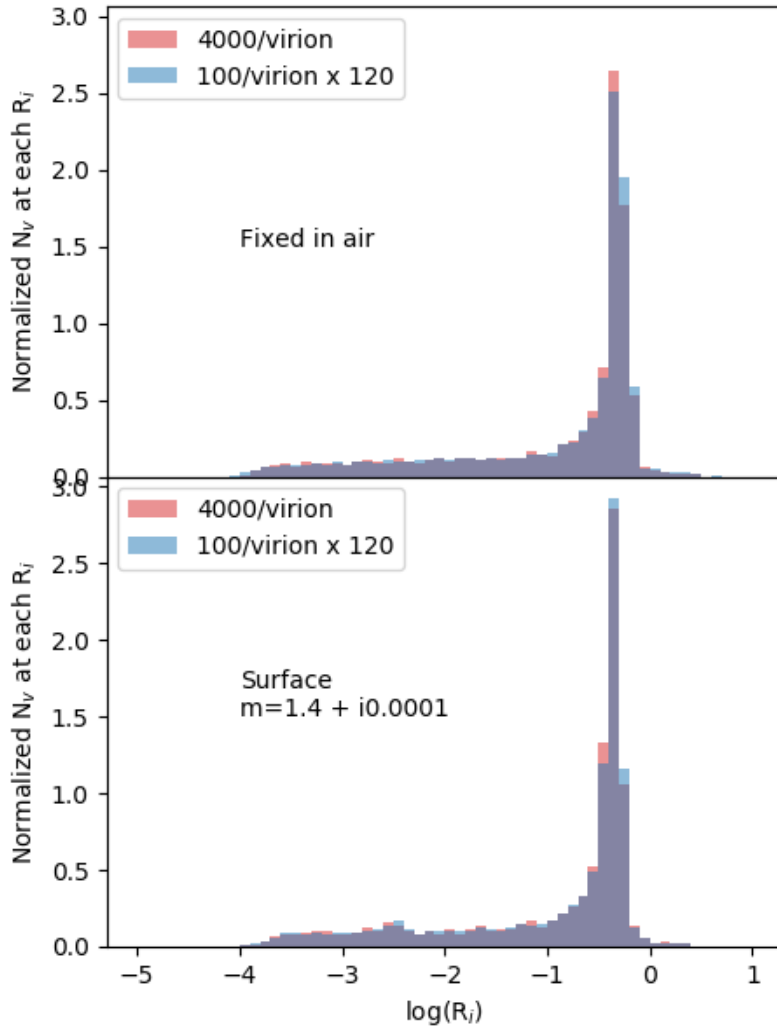

Figure S3: Relative numbers of virions in bins with the  $\log(R_i)$  shown. The particles are 9- $\mu\text{m}$  diameter and either fixed in air (upper panel) or resting on a surface with  $m=1.4 + i0.0001$ .

**Reference:**

Vejerano, E.P., Marr L.C. Physico-chemical characteristics of evaporating respiratory fluid droplets. *J R Soc Interface* 2018;15(139):20170939. Doi: 10.1098/rsif.2017.0939.

Wyllie A. L., Fournier J., Casanovas-Massana A., et al. Saliva or nasopharyngeal swab specimens for detection of SARS-CoV-2. *N. Engl. J. Med.* 2020; 383:1283-1286 <https://doi.org/10.1056/NEJMc2016359>.
